# Supplementary material
Source: PubMed Central journal article supplement (PMC5815877)

## Phenotypic Clusters Predict Outcomes in a Longitudinal Interstitial Lung Disease Cohort

*Ayodeji Adegunsoye, MD; Justin M. Oldham, MD; Jonathan H. Chung, MD; Steven M. Montner, MD; Cathryn Lee, MD; Leah J. Witt, MD; Danielle Stahlbaum, MD; Rene S. Bermea, MD; Lena W. Chen, BS; Scully Hsu, BS; Aliya N. Husain, MD; Imre Noth, MD; Rekha Vij, MD; Mary E. Streck, MD; and Matthew Churpek, MD, MPH, PhD*

CHEST 2018; 153(2):349-360

*Online supplements are not copyedited prior to posting and the author(s) take full responsibility for the accuracy of all data.*

© 2017 AMERICAN COLLEGE OF CHEST PHYSICIANS. Reproduction of this article is prohibited without written permission from the American College of Chest Physicians. See online for more details. DOI: 10.1016/j.chest.2017.09.026

**e-Table 1.** Baseline Characteristics of Patients With Chronic ILD Stratified by Phenotypic Clusters.

| Characteristics                                | All patients<br>(n=770) | Cluster 1<br>(n=210) | Cluster 2<br>(n=114) | Cluster 3<br>(n=276) | Cluster 4<br>(n=170) | p-value* |
|------------------------------------------------|-------------------------|----------------------|----------------------|----------------------|----------------------|----------|
| Age, mean (±SD)                                | 64.5 (11.6)             | 62.6 (11.4)          | 56.8 (13.4)          | 66.8 (10.4)          | 68.4 (9.1)           | <0.0001  |
| Female gender, n (%)                           | 369 (47.9)              | 170 (81.0)           | 108 (94.7)           | 57 (20.7)            | 34 (20.0)            | <0.0001  |
| African American race/ethnicity, n (%)         | 127 (16.5)              | 13 (6.2)             | 90 (78.9)            | 13 (4.7)             | 11 (6.5)             | <0.0001  |
| BMI, mean (±SD)                                | 30.1 (6.8)              | 31.9 (7.3)           | 29.3 (7.2)           | 29.6 (6.2)           | 29.3 (6.5)           | 0.0001   |
| Tobacco pack years, mean (±SD)                 | 17.7 (23.9)             | 13.7 (21.8)          | 8.6 (15.1)           | 20.4 (25.8)          | 24.4 (25.3)          | <0.0001  |
| Gastroesophageal reflux, n (%)                 | 394 (51.2)              | 173 (82.4)           | 44 (38.6)            | 51 (18.5)            | 126 (74.1)           | <0.0001  |
| Crackles, n (%)                                | 675 (87.7)              | 185 (88.1)           | 90 (78.9)            | 244 (88.4)           | 156 (91.8)           | 0.013    |
| Clubbing, n (%)                                | 111 (14.4)              | 25 (11.9)            | 10 (8.8)             | 41 (14.9)            | 35 (20.6)            | 0.025    |
| FVC (% predicted) (±SD)                        | 64.5 (18.1)             | 69.7 (18.0)          | 57.1 (17.8)          | 65.2 (17.8)          | 62.0 (16.8)          | <0.0001  |
| FEV1 (% predicted) (±SD)                       | 76.2 (20.6)             | 80.5 (20.9)          | 65.3 (20.7)          | 78.1 (20.6)          | 75.3 (17.8)          | <0.0001  |
| FEV1/FVC (% predicted) (±SD)                   | 83.7 (8.2)              | 83.7 (7.7)           | 85.4 (8.4)           | 83.3 (8.1)           | 83.1 (9.0)           | 0.083    |
| SpO <sub>2</sub> :FiO <sub>2</sub> ratio (±SD) | 409.7 (75.7)            | 411.6 (74.1)         | 423.8 (70.4)         | 409.9 (75.5)         | 397.3 (80.1)         | 0.0344   |
| DLCO (% predicted) (±SD)                       | 49.5 (21.0)             | 56.4 (22.6)          | 45.2 (19.6)          | 48.8 (20.4)          | 45.0 (18.7)          | <0.0001  |
| Gamma gap (mg/dl) (±SD)                        | 3.4 (0.6)               | 3.2 (0.6)            | 3.8 (0.7)            | 3.3 (0.6)            | 3.5 (0.6)            | <0.0001  |
| ANA titer, median (mean)                       | 320 (643)               | 160 (455)            | 1280 (1455)          | 160 (452)            | 320 (639)            | <0.0001  |
| Positive RF, n (%)                             | 86 (11.2)               | 16 (7.6)             | 20 (17.5)            | 32 (11.6)            | 18 (10.6)            | 0.059    |
| Other positive serologies**, n (%)             | 73 (9.5)                | 16 (7.6)             | 18 (15.8)            | 14 (5.1)             | 25 (14.7)            | <0.0001  |
| Radiographic honeycombing, n (%)               | 266 (34.5)              | 30 (14.3)            | 19 (16.7)            | 68 (24.6)            | 149 (87.6)           | <0.0001  |
| Radiographic emphysema, n (%)                  | 180 (23.4)              | 31 (14.8)            | 24 (21.1)            | 84 (30.4)            | 41 (24.1)            | 0.001    |
| Hypothyroidism, n (%)                          | 129 (16.8)              | 52 (24.8)            | 15 (13.2)            | 35 (12.7)            | 27 (15.9)            | 0.003    |
| Organic environmental exposure, n (%)          | 342 (44.4)              | 152 (72.4)           | 14 (12.3)            | 54 (19.6)            | 122 (71.8)           | <0.0001  |
| Inorganic environmental exposure, n (%)        | 137 (17.8)              | 24 (11.4)            | 3 (2.6)              | 58 (21.0)            | 52 (30.6)            | <0.0001  |
| PA diameter, mean (±SD)                        | 29.9 (4.9)              | 28.6 (4.2)           | 30.3 (5.3)           | 30.2 (5.1)           | 30.9 (4.6)           | <0.0001  |
| Aorta diameter, mean (±SD)                     | 33.8 (4.2)              | 32.6 (3.9)           | 31.5 (4.1)           | 34.8 (4.1)           | 35.0 (3.9)           | <0.0001  |

\*comparing clusters 1, 2, 3, and 4. ILD = Interstitial Lung Disease; BMI=body mass index; FVC=forced vital capacity; FEV1=forced expiratory volume in first second; SpO<sub>2</sub>=oxygen saturation by pulse oximetry; FiO<sub>2</sub>=fraction of inspired oxygen; DLCO=diffusion capacity of the lungs for carbon monoxide; ANA=antinuclear antibody; RF=rheumatoid factor; PA=pulmonary artery;

\*\*Anti-cyclic citrullinated peptide, Anti-double stranded DNA, Anti-Ro(SSA), Anti-La (SSB), Anti-ribonucleoprotein, Anti-Smith, Anti-topoisomerase (Scl-70), Anti-tRNA synthetase.

**e-Table 2.** Mixed Regression Model for Monthly FVC and DLCO Change in Chronic ILD.

|                                 | ILD Diagnosis Classification |                 |         |                 |                 |                  |
|---------------------------------|------------------------------|-----------------|---------|-----------------|-----------------|------------------|
|                                 | CHP                          | IPF             | p-value | CTD-ILD         | IPAF            | p-value          |
| <b>FVC decline, %<br/>(SE)</b>  | -0.16<br>(0.06)              | -0.25<br>(0.07) | 0.215   | -0.10<br>(0.07) | -0.09<br>(0.05) | 0.953            |
| <b>DLCO decline, %<br/>(SE)</b> | -0.16<br>(0.07)              | -0.31<br>(0.09) | 0.101   | -0.10<br>(0.05) | -0.20<br>(0.08) | 0.233            |
|                                 | Phenotypic Clusters          |                 |         |                 |                 |                  |
|                                 | Cluster 1                    | Cluster 3       | p-value | Cluster 2       | Cluster 4       | p-value          |
| <b>FVC decline, %<br/>(SE)</b>  | -0.16<br>(0.04)              | -0.17<br>(0.04) | 0.852   | +0.01<br>(0.05) | -0.30<br>(0.05) | <b>&lt;0.001</b> |
| <b>DLCO decline, %<br/>(SE)</b> | -0.23<br>(0.07)              | -0.14<br>(0.05) | 0.223   | +0.01<br>(0.09) | -0.48<br>(0.06) | <b>&lt;0.001</b> |

ILD = interstitial lung disease; FVC = forced vital capacity; DLCO = diffusing capacity of the lung for carbon monoxide; SE = standard error; CHP = chronic hypersensitivity pneumonitis; IPF = idiopathic pulmonary fibrosis; CTD-ILD = connective tissue disease-associated ILD

**e-Table 3.** Prediction of Survival by Clusters in Patients With Chronic Interstitial Lung Disease (ILD) After Adjustment for IPF Classification.

| Characteristic                        | Progression-free survival<br>(within 1 <sup>st</sup> year of diagnosis) |             |         | Transplant-free survival<br>(within 10 years of diagnosis) |             |         |
|---------------------------------------|-------------------------------------------------------------------------|-------------|---------|------------------------------------------------------------|-------------|---------|
|                                       | HR                                                                      | 95% CI      | p-value | HR                                                         | 95% CI      | p-value |
| <b>Multivariable Cox Regression*#</b> |                                                                         |             |         |                                                            |             |         |
| Phenotypic Cluster                    |                                                                         |             |         |                                                            |             |         |
| Cluster 1                             | 2.68                                                                    | 1.44 – 4.96 | 0.002   | 1.79                                                       | 1.09 – 2.93 | 0.021   |
| Cluster 3                             | 1.95                                                                    | 1.05 – 3.63 | 0.035   | 2.46                                                       | 1.56 – 3.87 | <0.001  |
| Cluster 4                             | 3.27                                                                    | 1.77 – 6.03 | <0.001  | 3.01                                                       | 1.88 – 4.80 | <0.001  |

IPF = idiopathic pulmonary fibrosis; \*reference category: Cluster 2; #n=727; adjusted for phenotypic cluster, IPF classification, gender, age, forced vital capacity, diffusing capacity of the lungs for carbon monoxide, ILD subtype and immunosuppressive therapy.

**e-Figure 1.** CONSORT Diagram.

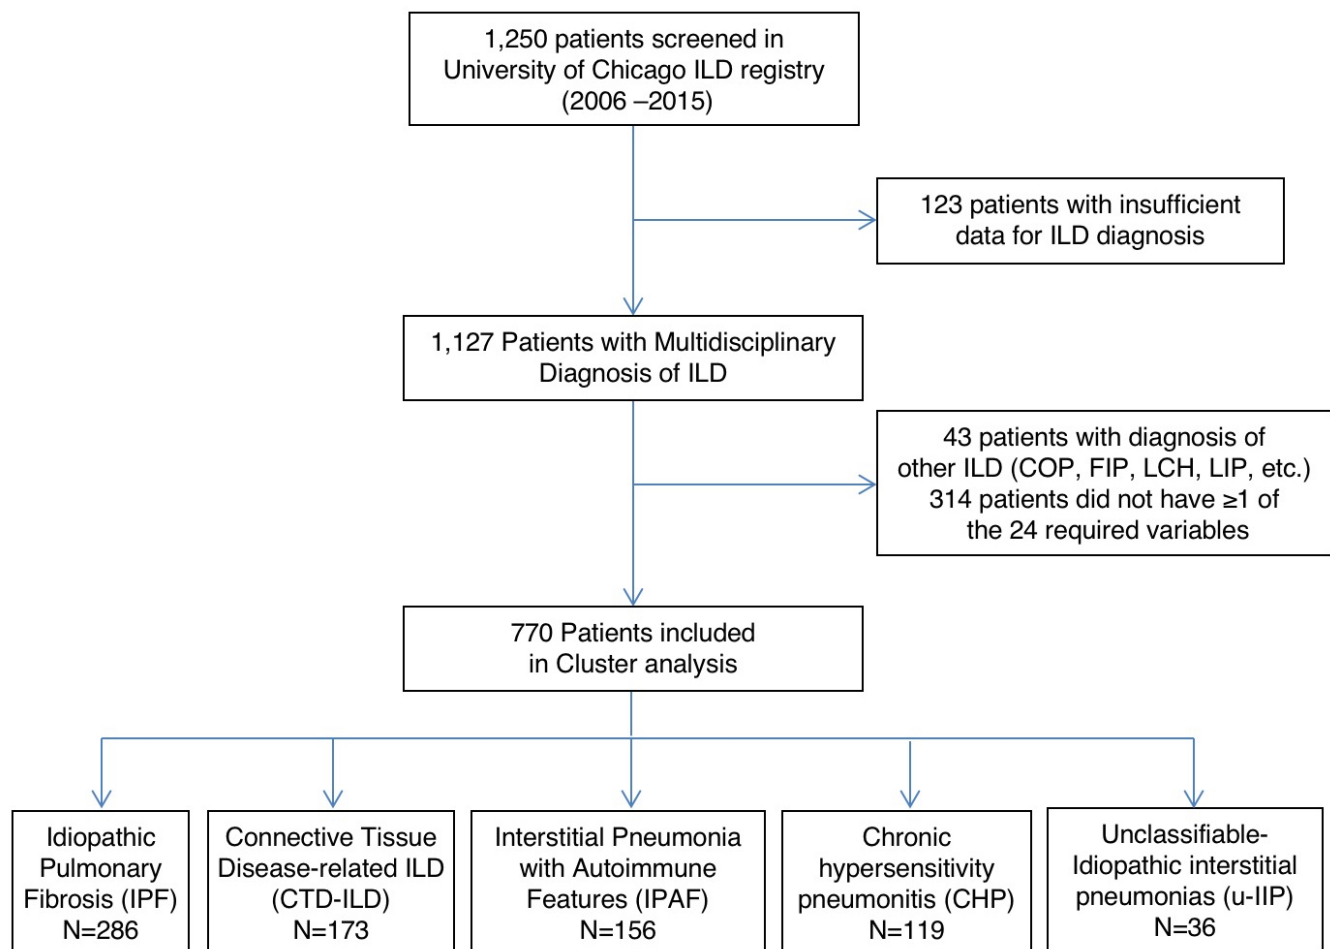

ILD= interstitial lung disease; COP = cryptogenic organizing pneumonia; FIP = familial interstitial pneumonia; LCH = Langerhans cell histiocytosis; LIP – lymphoid interstitial pneumonia.

**e-Figure 2.** (A) Progression-Free Survival (PFS) in Chronic Interstitial Lung Disease (ILD) After Substratification Into Idiopathic Pulmonary Fibrosis (IPF) and Non-IPF Cohorts; (B) 10-Year Transplant-Free Survival in Chronic ILD After Substratification Into IPF and Non-IPF Cohorts.

**PFS in Chronic Interstitial Lung Disease Stratified by ILD subtype**

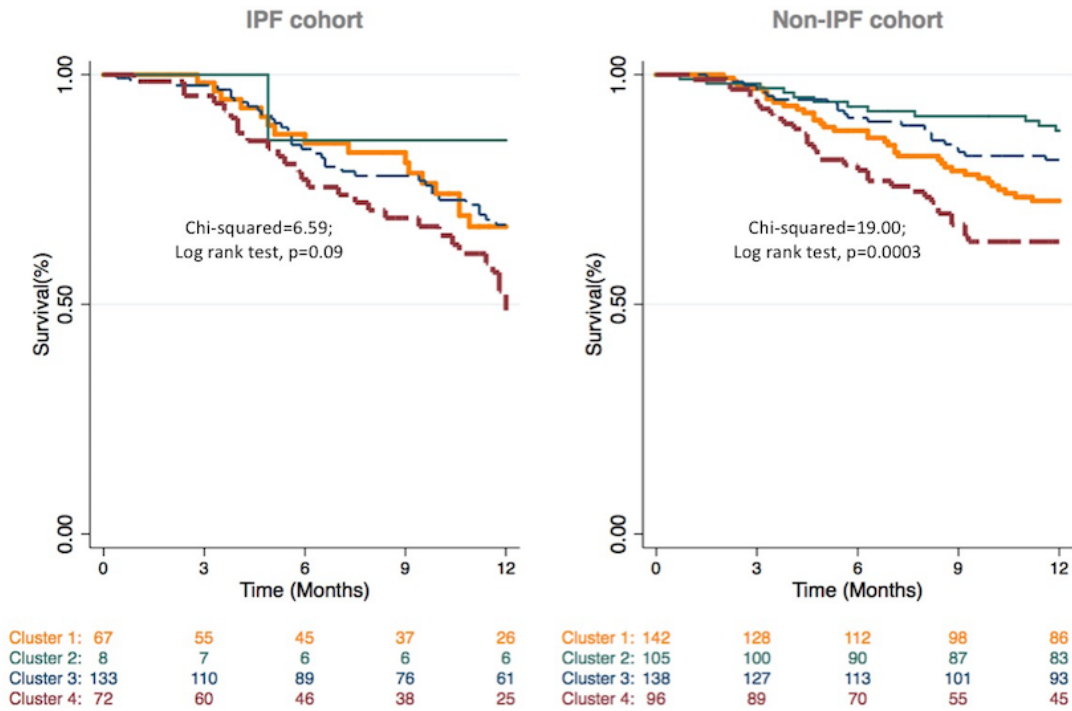

**TFS in Chronic Interstitial Lung Disease Stratified by ILD subtype**

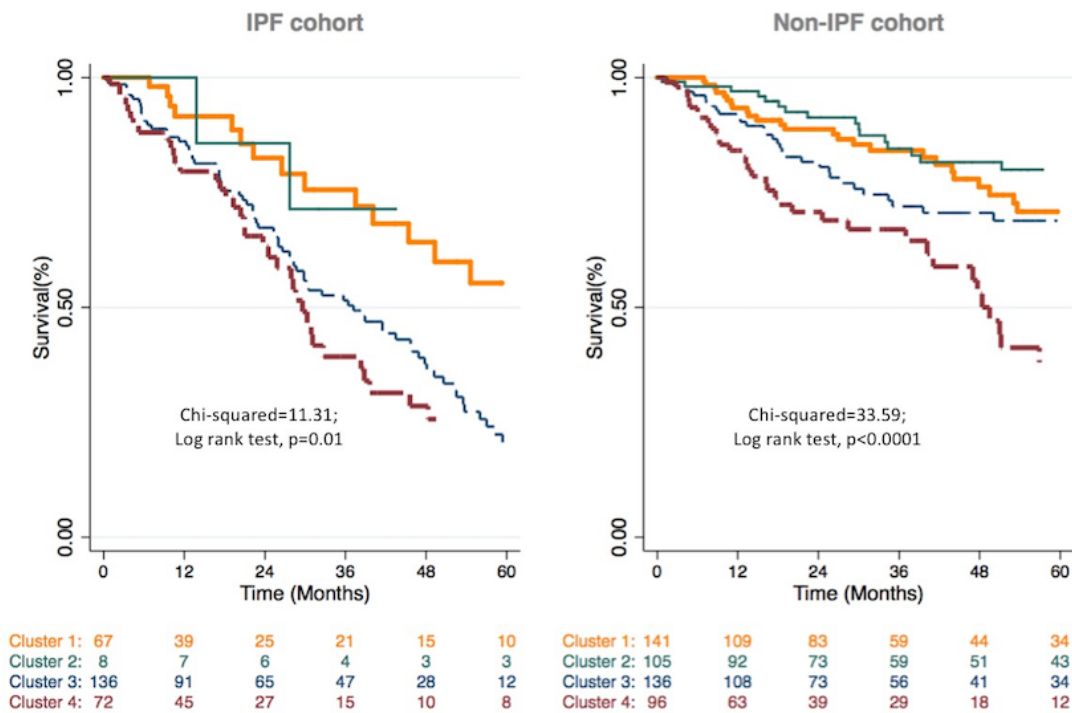

**e-Figure 3.** 10-Year Transplant-Free Survival in Chronic ILD (Excluding All Out-of-State Referrals); n = 585.

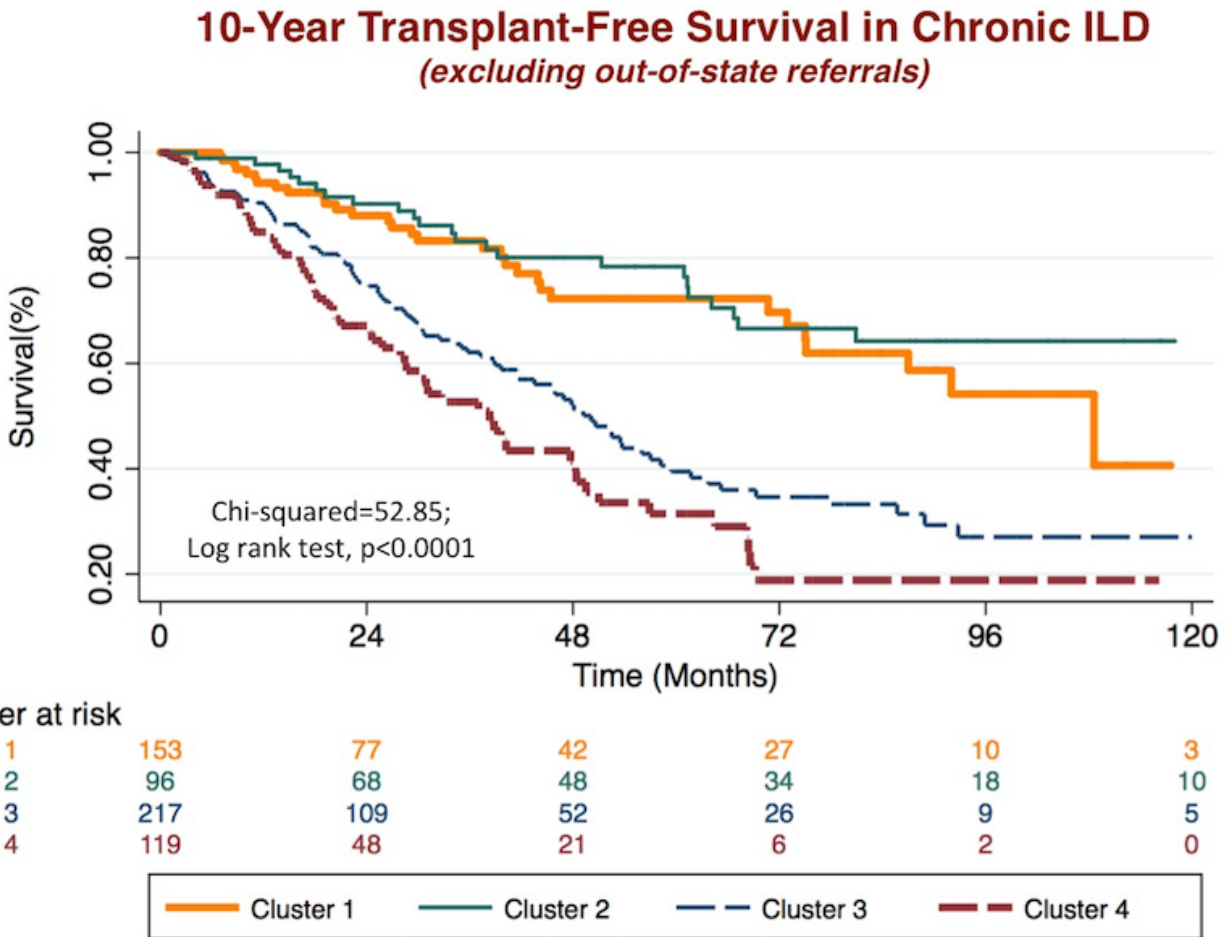

Supplement: mmc1.pdf [file mmc1.pdf]
